# Supplementary material for: Federally Qualified Health Centers and Performance of Medicare Accountable Care Organizations
Source: PubMed Central journal article supplement (PMC11574694; doi:10.1001/jamanetworkopen.2024.45536), 2024-11-18

## Supplementary Online Content

Kun L, Hou Y, McStay F, Gonzalez-Smith J, Saunders RS. Federally qualified health centers and performance of Medicare accountable care organizations. *JAMA Netw Open*. 2024;7(11):e2445536.  
doi:10.1001/jamanetworkopen.2024.45536

**eMethods.** Empirical Approaches

**eReferences.**

**eTable 1.** Sample Inclusion and Exclusion Criteria for the Difference-in-Difference Analysis

**eTable 2.** Timing of ACOs Including FQHCs for the First Time, 2017-2022

**eTable 3.** Baseline Characteristics of MSSP ACOs in the Analytic Sample for the Difference-in-Difference Analysis

**eTable 4.** Estimated Change in MSSP ACO-Assigned Beneficiaries, Utilization, Expenditure, and Quality Measures Associated With Participation of Federally Qualified Health Centers

**eTable 5.** Comparison of Unadjusted p-values and Sharpened False Discovery Rate q-values for Multiple Comparison Adjustment

**eTable 6.** Sensitivity Analysis: Estimated Percent Change in MSSP ACO-Assigned Beneficiaries, Utilization, and Expenditure Associated With Participation of Federally Qualified Health Centers using Logged Dependent Variables

**eTable 7.** Sensitivity Analysis: Estimated Change in MSSP ACO-Assigned Beneficiaries, Utilization, Expenditure, and Quality Measures Associated With Participation of Federally Qualified Health Centers Using Alternative Specifications

**eTable 8.** Sensitivity Analysis: Estimated Percentage-Point Change in MSSP ACO-Assigned Beneficiaries Associated With Participation of Federally Qualified Health Centers

**eTable 9.** Sensitivity Analysis: Estimated Change in MSSP ACO Provider Compositions Associated With Participation of Federally Qualified Health Centers

**eFigure.** Event Study Plots of Difference-in-Difference Analyses for Trends in Outcomes Among Treated and Control ACOs

This supplementary material has been provided by the authors to give readers additional information about their work.

## eMethods. Empirical Approaches

For each ACO-year-level outcome, we estimated the following difference-in-differences (DD) event-study specification:

$$Y_{it} = \beta_0 + Treated_i * [\sum_{j=-3}^{-2} \beta_j \mathbf{1}\{t - t_k^* = j\} + \sum_{j=0}^4 \delta_j \mathbf{1}\{t - t_k^* = j\}] + ACO_i + Year_t + \varepsilon_{it},$$

where  $Y_{it}$  is the outcome of interest (beneficiary characteristics, utilization, spending, quality of care) for ACO  $i$  in calendar year  $t$ .  $Treated_i = 1$  if the index ACO ever included FQHCs.  $t_k^*$  is the year when a treated ACO included first FQHCs.  $\mathbf{1}\{t - t_k^* = j\} = 1$  when  $t - t_k^* = j$ . The ACO fixed effects ( $ACO_i$ ) accounted for time-invariant differences before the inclusion of FQHCs between treated ACOs that included FQHCs and control ACOs that did not. The year-fixed effects ( $Year_t$ ) adjusted for year trends. We did not include other time-varying covariates that can be potentially affected by FQHC inclusion.  $\delta_j$  are the coefficient of interest, capturing the average differences in outcomes between treated ACOs and control ACOs, relative to the event time period -1 (where  $j = -1$ ). Standard errors were clustered at the ACO level.

Callaway and Sant'Anna Approach. We used the Callaway and Sant'Anna approach to account for the staggered inclusion of FQHCs. We followed the recently recommended approach to correct the asymmetric construction of pre- and post-treatment coefficients under the Callaway and Sant'Anna approach.<sup>1</sup> Specifically, we estimated staggered difference-in-difference regressions using the Stata command *xthdidregress* with the recommended post-estimation command *eventbaseline* to generate ATET estimates.<sup>2</sup> We included estimates for the event time period from -3 to 4 to calculate the aggregated estimates.

Test for Pre-trends. We assessed the validity of the parallel trend assumption by testing the presence of differential pre-trends using a joint F-test. We tested and reported whether the estimated coefficients for up to 3 years before the FQHC inclusion ( $\beta_j$ ) are equal and not statistically significant from zero. Our null hypothesis is  $\beta_{-3} = \beta_{-2} = 0$ . A significant test result ( $p < 0.05$ ) suggests evidence of pre-trend.

## eReferences

1. Roth J. Interpreting Event-Studies from Recent Difference-in-Differences Methods. January 22, 2024.

Accessed April 8, 2024. <https://www.jonathandroth.com/assets/files/HetEventStudies.pdf>

2. Koren M. EVENTBASELINE: Correct Event Study After XTHDIDREGRESS. [software]. Published online 2024. <https://github.com/codedthinking/eventbaseline>

**eTable 1. Sample inclusion and exclusion criteria for the difference-in-difference analysis**

| Identification of sample                                    | Number of ACOs | Number of ACO-years | Treated ACOs | Control ACOs |
|-------------------------------------------------------------|----------------|---------------------|--------------|--------------|
| MSSP ACOs during 2016-2022                                  | 836            | 3,463               | 224          | 612          |
| Exclude if observed data for only one year                  | 693            | 3,320               | 196          | 497          |
| Exclude if no pre-FQHC participation data (always treated)  | 581            | 2,803               | 84           | 497          |
| Exclude if ACOs dropped all FQHCs in later years (switcher) | 540            | 2,565               | 43           | 497          |

**eTable 2. Timing of ACOs including FQHCs for the first time, 2017-2022**

|                                     | Number of ACOs | Number of ACO-years |
|-------------------------------------|----------------|---------------------|
| <b>First-time FQHC inclusion</b>    |                |                     |
| 2017                                | 4              | 28                  |
| 2018                                | 6              | 28                  |
| 2019                                | 6              | 29                  |
| 2020                                | 7              | 37                  |
| 2021                                | 12             | 65                  |
| 2022                                | 8              | 36                  |
| <b>Never had FQHC participation</b> | 497            | 2,342               |

**eTable 3. Baseline Characteristics of MSSP ACOs in the analytic sample for the difference-in-difference analysis<sup>a</sup>**

| Outcomes                                                | ACOs that never had FQHC participation, Mean (SD) | ACOs that included FQHCs during the study period, Mean (SD) | p-value <sup>b</sup> |
|---------------------------------------------------------|---------------------------------------------------|-------------------------------------------------------------|----------------------|
| Number of ACOs                                          | 497                                               | 43                                                          |                      |
| ACO-assigned beneficiaries                              |                                                   |                                                             |                      |
| Total person-years                                      | 16061.9 (13677.5)                                 | 17023.6 (15314.7)                                           | 0.662                |
| Dual person-years                                       | 1067.9 (1035.4)                                   | 1114.5 (1193.5)                                             | 0.780                |
| Disabled person-years                                   | 1801 (1607.7)                                     | 2212.1 (1915.7)                                             | 0.114                |
| Racial and ethnic minoritized person-years <sup>c</sup> | 2353.5 (2473.3)                                   | 2355.6 (2539.9)                                             | 0.996                |
| Utilization <sup>d</sup>                                |                                                   |                                                             |                      |
| FQHC and RHC visits                                     | 223.5 (667.5)                                     | 269 (625.5)                                                 | 0.666                |
| Total primary care visits                               | 10626.2 (2353.6)                                  | 10410.7 (1502.2)                                            | 0.555                |
| Outpatient emergency department visits                  | 709.4 (189.3)                                     | 718.2 (156.9)                                               | 0.769                |
| Short-term acute care hospital discharges               | 297.1 (100.3)                                     | 290.1 (48.6)                                                | 0.651                |
| Skilled nursing facility discharges                     | 71.8 (73.7)                                       | 62 (24.2)                                                   | 0.387                |
| Per capita expenditure, \$                              | 11086.9 (3386.4)                                  | 10415.7 (1679.1)                                            | 0.199                |
| Quality <sup>e</sup> , %                                |                                                   |                                                             |                      |
| Influenza immunization                                  | 70.1 (13)                                         | 67.4 (12)                                                   | 0.183                |
| Tobacco use screening and cessation intervention        | 85.2 (16.1)                                       | 79.2 (18)                                                   | 0.022                |
| Screening for depression and follow-up plan             | 56.5 (21.9)                                       | 55.3 (21.7)                                                 | 0.724                |
| Colorectal cancer screening                             | 63.3 (14.2)                                       | 62.9 (11.5)                                                 | 0.855                |
| Breast cancer screening                                 | 68.8 (12.6)                                       | 69.8 (9.0)                                                  | 0.602                |
| Depression remission at 12 months                       | 7.8 (12.9)                                        | 8.3 (10.9)                                                  | 0.811                |
| Diabetes control: (HbA1c <=9%)                          | 82.6 (10.6)                                       | 81.9 (6.5)                                                  | 0.665                |
| Controlling high blood pressure                         | 71.3 (8.8)                                        | 70.1 (7.0)                                                  | 0.397                |

Abbreviations: MSSP, Medicare Shared Saving Program; ACO, accountable care organization; FQHC, federally qualified health centers; RHC, rural health clinic; ED, emergency department; HbA1c, hemoglobin A1c.

<sup>a</sup> Estimated in the year when an ACO first appeared in the data. <sup>b</sup> Two-sided t-test. <sup>c</sup> Includes all beneficiaries who are American Indian or Alaska Native, Asian and Pacific Islander, Black, Hispanic, Other, and Unknown. <sup>d</sup> Measures are presented in per 1,000 person-years. <sup>e</sup> Measures are presented as percentage of patients. <sup>f</sup> Advanced practitioners include physician assistants, registered nurses, and certified nurse midwives.

**eTable 4. Estimated Change in MSSP ACO-Assigned Beneficiaries, Utilization, Expenditure, and Quality Measures Associated with Participation of Federally Qualified Health Centers**

| Outcomes                  | Total person-year       | Dual person-year       | Disabled person-year | Minoritized person-year | FQHC & RHC visits           | Primary care visits     | ED visits            | Hospital discharges | SNF discharges         |
|---------------------------|-------------------------|------------------------|----------------------|-------------------------|-----------------------------|-------------------------|----------------------|---------------------|------------------------|
|                           | Coefficient (SE)        | Coefficient (SE)       | Coefficient (SE)     | Coefficient (SE)        | Coefficient (SE)            | Coefficient (SE)        | Coefficient (SE)     | Coefficient (SE)    | Coefficient (SE)       |
| <b>Time Period</b>        |                         |                        |                      |                         |                             |                         |                      |                     |                        |
| -3                        | -291.4<br>(1,538.4)     | -101.8<br>(104.3)      | -74.2<br>(217.8)     | -18.0<br>(175.4)        | 4.1<br>(63.2)               | -149.1<br>(173.3)       | -15.9<br>(21.6)      | -9.9<br>(8.2)       | -0.1<br>(3.7)          |
| -2                        | 425.7<br>(728.5)        | 23.2<br>(63.7)         | 52.1<br>(87.3)       | 61.6<br>(140.4)         | -4.1<br>(43.2)              | 4.9<br>(105.0)          | -0.6<br>(14.0)       | -2.3<br>(5.5)       | 0.0<br>(2.5)           |
| -1                        | Reference               | Reference              | Reference            | Reference               | Reference                   | Reference               | Reference            | Reference           | Reference              |
| 0                         | 11,507.0**<br>(3,880.7) | 1,073.3**<br>(323.6)   | 1,567.0**<br>(446.5) | 1,562.8**<br>(464.1)    | 617.3**<br>(191.8)          | -91.7<br>(96.0)         | 33.9*<br>(13.5)      | 4.9<br>(3.9)        | 1.4<br>(2.3)           |
| 1                         | 13,879.1**<br>(5,062.9) | 1,383.6**<br>(451.5)   | 1,763.4**<br>(539.5) | 2,131.6**<br>(615.7)    | 740.6*<br>(294.7)           | -136.0<br>(197.2)       | 28.4<br>(18.0)       | 2.5<br>(6.2)        | 0.1<br>(3.6)           |
| 2                         | 17,928.6**<br>(8,765.4) | 1,458.1*<br>(597.7)    | 1,966.0*<br>(830.7)  | 2,311.0*<br>(1,013.8)   | 366.7**<br>(98.6)           | 278.5<br>(253.9)        | 7.0<br>(25.3)        | 4.8<br>(7.0)        | 4.8<br>(4.3)           |
| 3                         | 2,449.6<br>(3,798.9)    | 265.7*<br>(126.4)      | 325.6<br>(305.5)     | 470.5<br>(561.5)        | 363.3**<br>(114.9)          | 530.6<br>(320.9)        | -20.9<br>(34.5)      | 6.8<br>(9.1)        | 7.3*<br>(3.3)          |
| 4                         | 2,429.8<br>(2,115.2)    | 52.7<br>(88.2)         | 29.4<br>(184.6)      | 350.7<br>(334.6)        | 384.8**<br>(127.1)          | 807.4<br>(506.1)        | -42.3<br>(46.3)      | 12.8<br>(11.0)      | 11.2*<br>(5.1)         |
| Observations <sup>a</sup> | 2,565                   | 2,565                  | 2,565                | 2,565                   | 2,565                       | 2,565                   | 2,565                | 2,565               | 2,565                  |
| Outcomes                  | Per capita expenditure  | Influenza immunization | Tobacco screening    | Depression screening    | Colorectal cancer screening | Breast cancer screening | Depression remission | Diabetes control    | Blood pressure control |
|                           | Coefficient (SE)        | Coefficient (SE)       | Coefficient (SE)     | Coefficient (SE)        | Coefficient (SE)            | Coefficient (SE)        | Coefficient (SE)     | Coefficient (SE)    | Coefficient (SE)       |
| <b>Time period</b>        |                         |                        |                      |                         |                             |                         |                      |                     |                        |
| -3                        | -210.2<br>(238.9)       | 1.2<br>(2.2)           | -3.4<br>(4.5)        | 1.2<br>(3.6)            | 1.4<br>(2.2)                | 2.1<br>(1.9)            | 0.6<br>(4.1)         | 2.0*<br>(1.0)       | 0.0<br>(1.0)           |
| -2                        | -55.8<br>(184.5)        | -1.0<br>(1.4)          | -1.9<br>(3.4)        | -0.3<br>(1.9)           | 0.3<br>(1.7)                | 1.0<br>(1.2)            | -0.9<br>(3.4)        | 0.3<br>(0.7)        | 0.7<br>(0.8)           |
| -1                        | Reference               | Reference              | Reference            | Reference               | Reference                   | Reference               | Reference            | Reference           | Reference              |
| 0                         | 32.5<br>(133.0)         | 1.4<br>(1.7)           | 7.9**<br>(2.8)       | 3.0<br>(2.3)            | -0.2<br>(1.6)               | -0.6<br>(1.2)           | -0.7<br>(1.8)        | 0.1<br>(1.4)        | 0.1<br>(0.9)           |
| 1                         | -99.9<br>(191.2)        | 1.9<br>(2.1)           | 5.4<br>(4.2)         | 5.5<br>(3.1)            | -1.6<br>(2.0)               | -2.5<br>(1.9)           | 0.6<br>(3.0)         | 1.8<br>(1.2)        | 0.5<br>(1.1)           |
| 2                         | 166.5<br>(145.2)        | 6.0<br>(3.5)           | 15.3**<br>(5.1)      | 6.9<br>(4.9)            | 3.5<br>(2.4)                | 1.6<br>(1.7)            | 6.0<br>(4.4)         | -0.3<br>(3.3)       | -0.1<br>(1.4)          |
| 3                         | 89.1<br>(162.2)         | 8.4**<br>(3.0)         | 11.7<br>(7.0)        | 13.1*<br>(5.6)          | 3.2<br>(2.7)                | 0.4<br>(1.8)            | 2.7<br>(5.3)         | 3.0<br>(2.6)        | 2.1<br>(1.3)           |
| 4                         | 213.2<br>(242.3)        | 12.2**<br>(4.2)        | 10.0*<br>(4.8)       | 17.8*<br>(7.5)          | 4.8*<br>(2.2)               | 2.2<br>(2.4)            | 6.8<br>(7.3)         | 4.1<br>(3.4)        | 2.5<br>(2.3)           |
| Observations              | 2,565                   | 2,532                  | 2,531                | 2,545                   | 2,530                       | 2,530                   | 2,479                | 2,545               | 2,542                  |

Abbreviations: MSSP, Medicare Shared Saving Program; ACO, accountable care organization; FQHC, federally qualified health centers; RHC, rural health clinic; ED, emergency department; SNF, skilled nursing facility.

<sup>a</sup>Analyses were limited to ACO-years with non-missing data for each outcome; the corresponding observations for each outcome are reported.

\*\* p<0.01, \* p<0.05.

**eTable 5. Comparison of Unadjusted p-values and Sharpened False Discovery Rate q-values for Multiple Comparison Adjustment**

| Outcomes                                                | Estimated change | Unadjusted p-value | Sharpened q-value |
|---------------------------------------------------------|------------------|--------------------|-------------------|
| Assigned beneficiaries                                  |                  |                    |                   |
| Total person-years                                      | 9594.1           | 0.01               | 0.02              |
| Dual person-years                                       | 872.9            | <.001              | 0.01              |
| Disabled person-years                                   | 1137.6           | <.001              | 0.01              |
| Racial and ethnic minoritized person-years <sup>b</sup> | 1350.8           | <.001              | 0.01              |
| Utilization <sup>c</sup>                                |                  |                    |                   |
| FQHC and RHC visits                                     | 494.5            | <.001              | <.001             |
| Total primary care visits                               | 325.8            | 0.17               | 0.19              |
| Outpatient emergency department visits                  | 6.7              | 0.79               | 0.45              |
| Short-term acute care hospital discharges               | 10.4             | 0.15               | 0.17              |
| Skilled nursing facility discharges                     | 5.0              | 0.08               | 0.10              |
| Per capita expenditure, \$                              | 169.0            | 0.31               | 0.30              |
| Quality <sup>d</sup> , %                                |                  |                    |                   |
| Influenza immunization                                  | 5.9              | 0.01               | 0.02              |
| Tobacco use screening and cessation intervention        | 11.8             | 0.00               | 0.02              |
| Screening for depression and follow-up plan             | 8.9              | 0.04               | 0.06              |
| Colorectal cancer screening                             | 1.3              | 0.48               | 0.38              |
| Breast cancer screening                                 | -0.8             | 0.57               | 0.40              |
| Depression remission at 12 months                       | 3.2              | 0.42               | 0.35              |
| Diabetes control: (HbA1c <=9%)                          | 0.9              | 0.62               | 0.40              |
| Controlling high blood pressure                         | 0.8              | 0.52               | 0.38              |

Abbreviations: MSSP, Medicare Shared Saving Program; ACO, accountable care organization; FQHC, federally qualified health centers; RHC, rural health clinic; ED, emergency department.

<sup>a</sup> Means of outcomes across all pre-treatment years among ACOs which included federally qualified health center during 2016-2022. <sup>b</sup> Includes all beneficiaries who are American Indian or Alaska Native, Asian and Pacific Islander, Black, Hispanic, Other, and Unknown. <sup>c</sup> Measures are presented in per 1,000 person-years. <sup>d</sup> Measures are presented as percentage of patients.

**eTable 6. Sensitivity Analysis: Estimated Percent Change in MSSP ACO-Assigned Beneficiaries, Utilization, and Expenditure Associated with Participation of Federally Qualified Health Centers using Logged Dependent Variables**

| Outcomes                  | Total person-year             | Dual person-year              | Disabled person-year          | Minoritized person-year       | FQHC & RHC visits             | Primary care visits           | ED visits                     | Short-term hospital discharges | SNF discharges                | Per capita expenditure        |
|---------------------------|-------------------------------|-------------------------------|-------------------------------|-------------------------------|-------------------------------|-------------------------------|-------------------------------|--------------------------------|-------------------------------|-------------------------------|
|                           | Estimated percent change (SE) | Estimated percent change (SE) | Estimated percent change (SE) | Estimated percent change (SE) | Estimated percent change (SE) | Estimated percent change (SE) | Estimated percent change (SE) | Estimated percent change (SE)  | Estimated percent change (SE) | Estimated percent change (SE) |
| <b>ATET<sup>a</sup></b>   | 48.8**                        | 70.2**                        | 67.7**                        | 57.0**                        | 490.9**                       | 3.8                           | 2.7                           | 3.5                            | 3.8                           | 1.3                           |
|                           | (0.1)                         | (0.1)                         | (0.1)                         | (0.1)                         | (0.3)                         | (0.0)                         | (0.0)                         | (0.0)                          | (0.1)                         | (0.0)                         |
| <b>Time period</b>        |                               |                               |                               |                               |                               |                               |                               |                                |                               |                               |
| -3                        | -1.5                          | -15.2                         | -7.6                          | -5.0                          | -5.3                          | -1.7                          | -3.7                          | -3.9                           | -0.0                          | -1.5                          |
|                           | (0.1)                         | (0.2)                         | (0.1)                         | (0.1)                         | (0.3)                         | (0.0)                         | (0.0)                         | (0.0)                          | (0.1)                         | (0.0)                         |
| -2                        | 2.2                           | 2.4                           | 5.0                           | 1.5                           | 10.3                          | -0.3                          | -0.4                          | -0.6                           | 2.0                           | -0.0                          |
|                           | (0.1)                         | (0.1)                         | (0.1)                         | (0.1)                         | (0.2)                         | (0.0)                         | (0.0)                         | (0.0)                          | (0.1)                         | (0.0)                         |
| -1                        | Reference                     | Reference                     | Reference                     | Reference                     | Reference                     | Reference                     | Reference                     | Reference                      | Reference                     | Reference                     |
|                           | -                             | -                             | -                             | -                             | -                             | -                             | -                             | -                              | -                             | -                             |
| 0                         | 48.1**                        | 83.1**                        | 80.7**                        | 55.8**                        | 528.2**                       | -0.5                          | 5.2*                          | 1.7                            | 3.7                           | 0.7                           |
|                           | (0.1)                         | (0.1)                         | (0.1)                         | (0.1)                         | (0.3)                         | (0.0)                         | (0.0)                         | (0.0)                          | (0.0)                         | (0.0)                         |
| 1                         | 68.4**                        | 114.3**                       | 106.2**                       | 82.5**                        | 775.3**                       | -0.7                          | 4.8                           | 0.8                            | 0.5                           | -0.4                          |
|                           | (0.1)                         | (0.2)                         | (0.1)                         | (0.2)                         | (0.3)                         | (0.0)                         | (0.0)                         | (0.0)                          | (0.1)                         | (0.0)                         |
| 2                         | 90.0**                        | 107.4**                       | 105.2**                       | 91.7**                        | 587.0**                       | 3.1                           | 2.9                           | 2.2                            | 7.2                           | 1.5                           |
|                           | (0.2)                         | (0.3)                         | (0.2)                         | (0.3)                         | (0.4)                         | (0.0)                         | (0.0)                         | (0.0)                          | (0.1)                         | (0.0)                         |
| 3                         | 28.4                          | 18.7                          | 36.5*                         | 30.2                          | 459.3**                       | 5.5                           | -1.6                          | 2.2                            | 4.4                           | 0.3                           |
|                           | (0.2)                         | (0.1)                         | (0.2)                         | (0.2)                         | (0.3)                         | (0.0)                         | (0.0)                         | (0.0)                          | (0.1)                         | (0.0)                         |
| 4                         | 21.3                          | 17.0*                         | 20.9*                         | 26.8**                        | 267.0**                       | 8.2                           | -4.5                          | 3.0                            | 6.7                           | 1.6                           |
|                           | (0.1)                         | (0.1)                         | (0.1)                         | (0.1)                         | (0.4)                         | (0.0)                         | (0.0)                         | (0.0)                          | (0.1)                         | (0.0)                         |
| Observations <sup>b</sup> | 2,565                         | 2,527                         | 2,562                         | 2,565                         | 2,552                         | 2,565                         | 2,565                         | 2,565                          | 2,565                         | 2,565                         |

<sup>a</sup> Estimated percent changes of outcomes aggregated across 4 years following the inclusion of first FQHCs.

<sup>b</sup> Observations with zero counts were excluded.

Abbreviations: ATET, average treatment effect on the treated; MSSP, Medicare Shared Saving Program; ACO, accountable care organization; FQHC, federally qualified health centers; RHC, rural health clinic; ED, emergency department; SNF, skilled nursing facility.

\*\* p<0.01, \* p<0.05.



**eTable 7. Sensitivity Analysis: Estimated Change in MSSP ACO-Assigned Beneficiaries, Utilization, Expenditure, and Quality Measures Associated with Participation of Federally Qualified Health Centers Using Alternative Specifications**

| Outcomes                                                | Baseline two-way fixed effects model without adjusting for potential heterogeneous treatment effects due to staggered FQHC inclusion |                     | Adding ACOs that included FQHCs and dropped all FQHCs in later years |                     |
|---------------------------------------------------------|--------------------------------------------------------------------------------------------------------------------------------------|---------------------|----------------------------------------------------------------------|---------------------|
|                                                         | Estimated change                                                                                                                     | (95% CI)            | Estimated change                                                     | (95% CI)            |
| Assigned beneficiaries                                  |                                                                                                                                      |                     |                                                                      |                     |
| Total person-years                                      | 11331.4                                                                                                                              | (3556.3 to 19106.4) | 9027.0                                                               | (2288.6 to 15765.5) |
| Dual person-years                                       | 1121.9                                                                                                                               | (443.1 to 1800.7)   | 797.8                                                                | (324.8 to 1270.8)   |
| Disabled person-years                                   | 1460.9                                                                                                                               | (637.5 to 2284.4)   | 1091.9                                                               | (411.2 to 1772.5)   |
| Racial and ethnic minoritized person-years <sup>b</sup> | 1683.4                                                                                                                               | (635.9 to 2730.9)   | 1273.4                                                               | (433 to 2113.7)     |
| Utilization <sup>c</sup>                                |                                                                                                                                      |                     |                                                                      |                     |
| FQHC and RHC visits                                     | 700.5                                                                                                                                | (297.6 to 1103.4)   | 468.2                                                                | (254.8 to 681.5)    |
| Total primary care visits                               | -42.7                                                                                                                                | (-270.7 to 185.2)   | 307.8                                                                | (-125.7 to 741.3)   |
| Outpatient emergency department visits                  | 32.5                                                                                                                                 | (-1.8 to 66.8)      | 7.8                                                                  | (-38.9 to 54.4)     |
| Short-term acute care hospital discharges               | 8.0                                                                                                                                  | (-1.6 to 17.6)      | 9.0                                                                  | (-4.4 to 22.4)      |
| Skilled nursing facility discharges                     | 2.2                                                                                                                                  | (-2.2 to 6.6)       | 5.8                                                                  | (-0.01 to 11.5)     |
| Per capita expenditure, \$                              | 86.0                                                                                                                                 | (-175.8 to 347.9)   | 153.5                                                                | (-153.3 to 460.2)   |
| Quality <sup>d</sup> , %                                |                                                                                                                                      |                     |                                                                      |                     |
| Influenza immunization                                  | 1.0                                                                                                                                  | (-2.0 to 4.0)       | 4.7                                                                  | (0.4 to 9)          |
| Tobacco use screening and cessation intervention        | 5.9                                                                                                                                  | (-0.1 to 11.8)      | 11.0                                                                 | (3.6 to 18.5)       |
| Screening for depression and follow-up plan             | 3.3                                                                                                                                  | (-1.1 to 7.8)       | 7.7                                                                  | (-0.6 to 16.1)      |
| Colorectal cancer screening                             | -1.8                                                                                                                                 | (-4.6 to 0.9)       | 0.8                                                                  | (-2.7 to 4.4)       |
| Breast cancer screening                                 | -1.6                                                                                                                                 | (-3.9 to 0.7)       | -1.7                                                                 | (-4.7 to 1.3)       |
| Depression remission at 12 months                       | 0.7                                                                                                                                  | (-2.2 to 3.6)       | 2.9                                                                  | (-4.1 to 9.8)       |
| Diabetes control: (HbA1c <=9%)                          | -0.9                                                                                                                                 | (-3.2 to 1.4)       | 0.9                                                                  | (-2.6 to 4.4)       |
| Controlling high blood pressure                         | -0.6                                                                                                                                 | (-2.1 to 0.9)       | 0.4                                                                  | (-2.0 to 2.8)       |

Abbreviations: MSSP, Medicare Shared Saving Program; ACO, accountable care organization; FQHC, federally qualified health centers; CI, confidence interval; RHC, rural health clinic; ED, emergency department.

\*\* p<0.01, \* p<0.05.

**eTable 8. Sensitivity Analysis: Estimated Percentage-Point Change in MSSP ACO-Assigned Beneficiaries Associated with Participation of Federally Qualified Health Centers**

| Outcomes                | Percentage of dual person-year | Percentage of disabled person-year | Percentage of minoritized person-year |
|-------------------------|--------------------------------|------------------------------------|---------------------------------------|
|                         | Estimated percent change (SE)  | Estimated percent change (SE)      | Estimated percent change (SE)         |
| <b>ATET<sup>a</sup></b> | 1.26<br>(0.71)                 | 0.61<br>(0.65)                     | 0.49<br>(0.92)                        |
| <b>Time period</b>      |                                |                                    |                                       |
| -3                      | -0.92<br>(0.76)                | -0.77<br>(0.76)                    | -0.58<br>(1.28)                       |
| -2                      | 0.06<br>(0.35)                 | 0.30<br>(0.40)                     | -0.02<br>(0.55)                       |
| -1                      | Reference<br>-                 | Reference<br>-                     | Reference<br>-                        |
| 0                       | 1.73*<br>(0.77)                | 2.19**<br>(0.63)                   | 0.45<br>(0.98)                        |
| 1                       | 2.89<br>(1.71)                 | 2.01*<br>(0.82)                    | 1.38<br>(1.51)                        |
| 2                       | 0.57<br>(0.59)                 | 0.11<br>(0.68)                     | -0.46<br>(1.44)                       |
| 3                       | 0.21<br>(0.53)                 | -0.40<br>(0.72)                    | 0.22<br>(0.61)                        |
| 4                       | -0.54<br>(0.58)                | -1.65<br>(0.99)                    | -0.16<br>(1.02)                       |
| Observations            | 2,565                          | 2,565                              | 2,565                                 |

<sup>a</sup> Estimated percentage-point changes of outcomes aggregated across 4 years following the inclusion of first FQHCs.

Abbreviations: ATET, average treatment effect on the treated; MSSP, Medicare Shared Saving Program; ACO, accountable care organization.

\*\* p<0.01, \* p<0.05.

**eTable 9. Sensitivity Analysis: Estimated Change in MSSP ACO Provider Compositions Associated with Participation of Federally Qualified Health Centers**

| Outcomes           | Number of Rural Health Clinics | Number of Critical Access Hospitals |
|--------------------|--------------------------------|-------------------------------------|
|                    | Estimated change<br>(SE)       | Estimated change<br>(SE)            |
| <b>ATET</b>        | 3.0                            | 0.6                                 |
|                    | (1.6)                          | (0.7)                               |
| <b>Time period</b> |                                |                                     |
| -3                 | -0.0                           | -0.1                                |
|                    | (0.7)                          | (0.2)                               |
| -2                 | 0.3                            | 0.2*                                |
|                    | (0.3)                          | (0.1)                               |
| -1                 | Reference                      | Reference                           |
|                    | -                              | -                                   |
| 0                  | 2.0                            | 0.9                                 |
|                    | (1.2)                          | (0.6)                               |
| 1                  | 2.3                            | 1.2                                 |
|                    | (1.7)                          | (1.0)                               |
| 2                  | 4.8                            | 1.7                                 |
|                    | (3.5)                          | (1.4)                               |
| 3                  | 2.8                            | 0.4                                 |
|                    | (1.7)                          | (1.0)                               |
| 4                  | 3.6                            | -0.7                                |
|                    | (2.7)                          | (0.5)                               |
| Observations       | 2,565                          | 2,565                               |

Abbreviations: ATET, average treatment effect on the treated; MSSP, Medicare Shared Saving Program; ACO, accountable care organization.

\*\* p<0.01, \* p<0.05.

# eFigure. Event Study Plots of Difference-in-Difference Analyses for Trends in Outcomes Among Treated and Control ACOs

## Total person-years

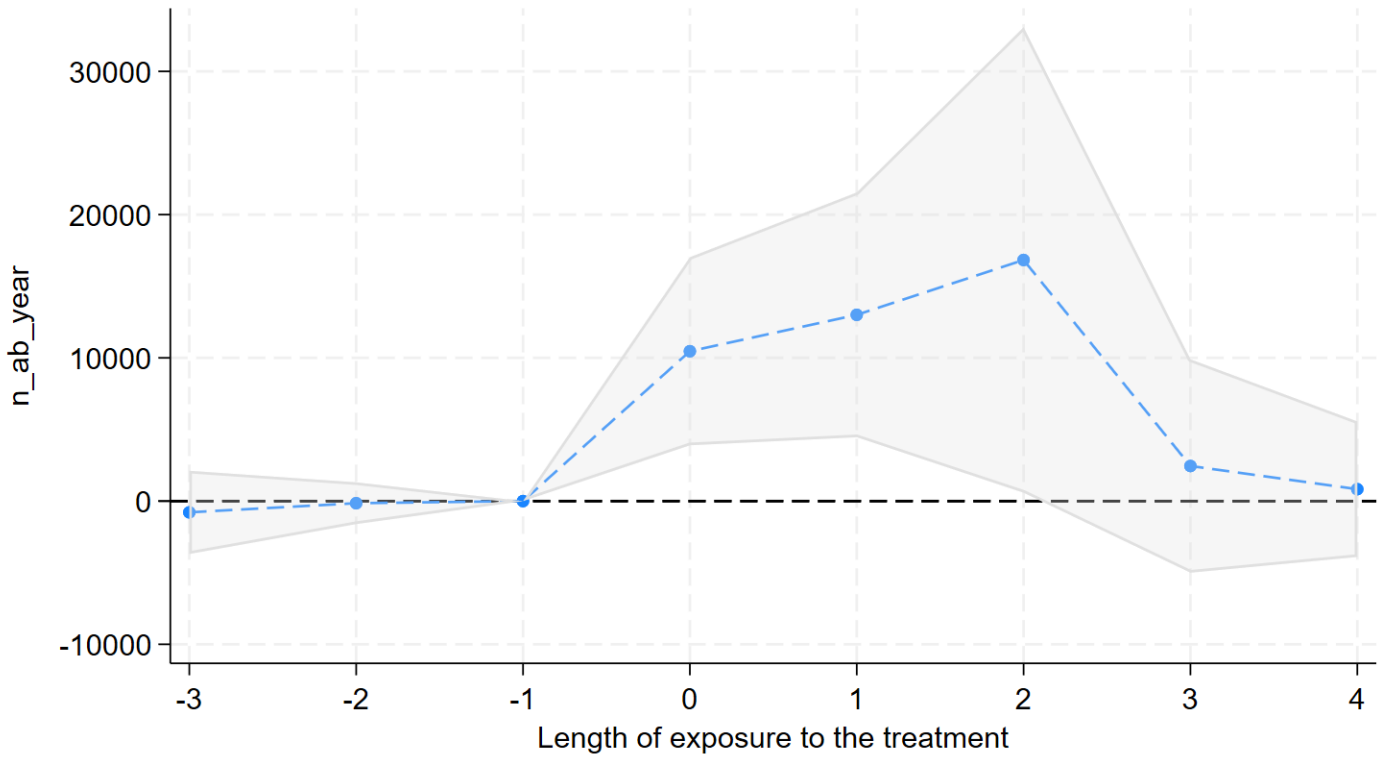

## Dual person-years

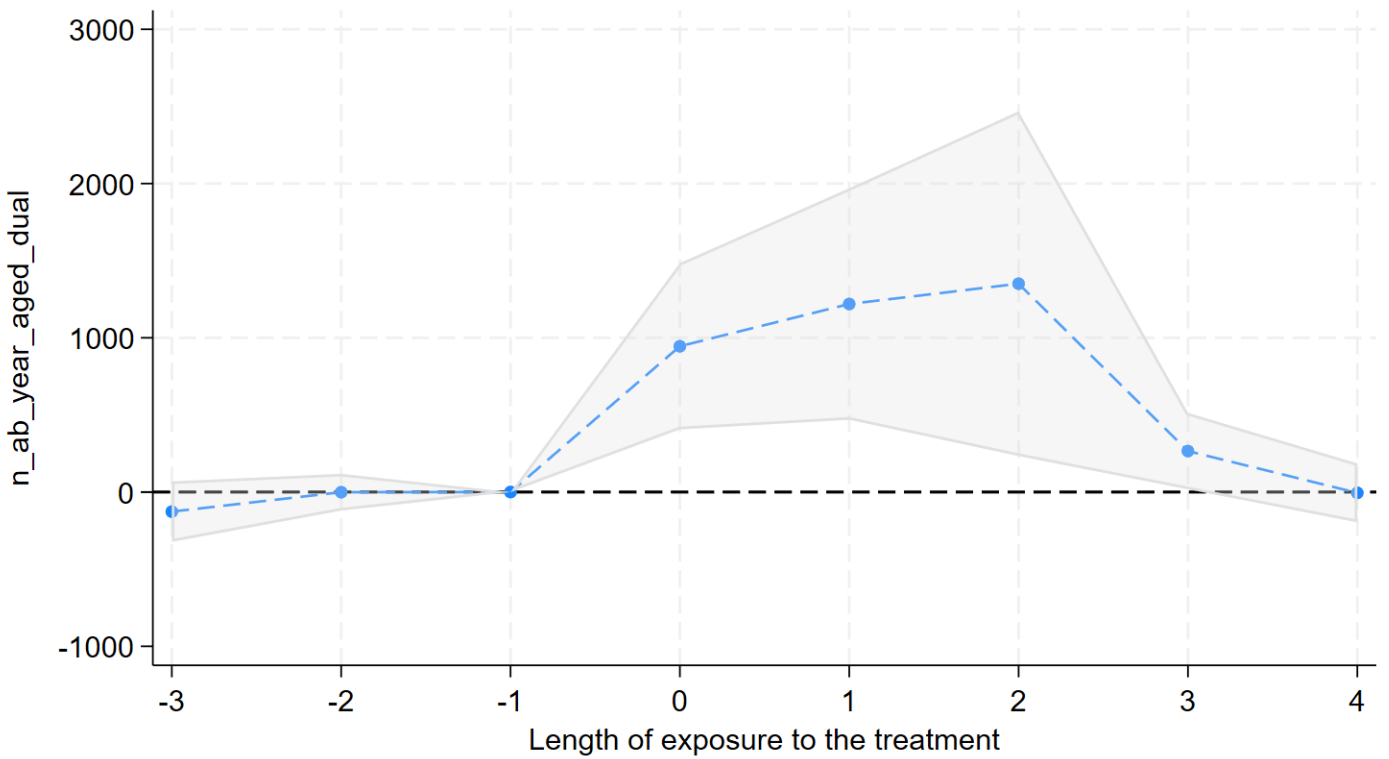

### Disabled person-years

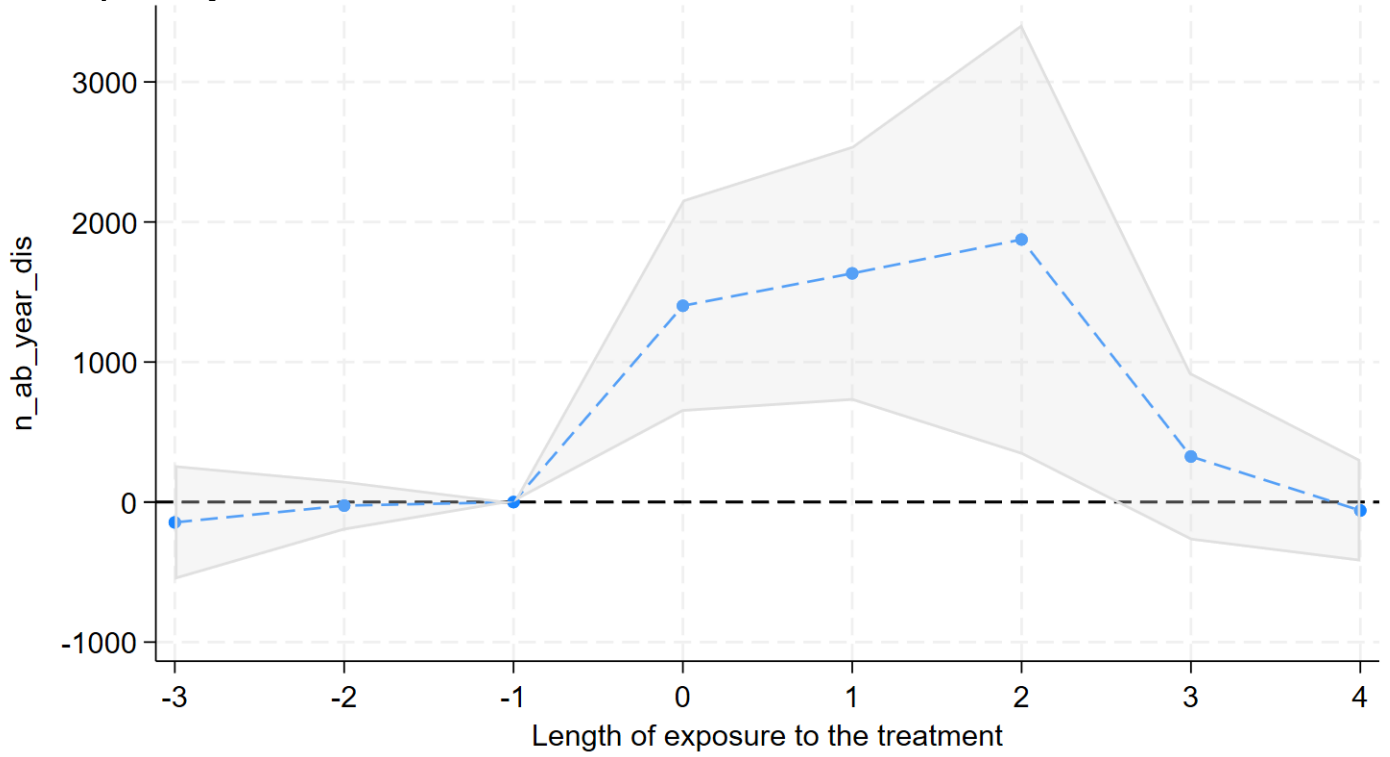

### Racial and ethnic minoritized person-years

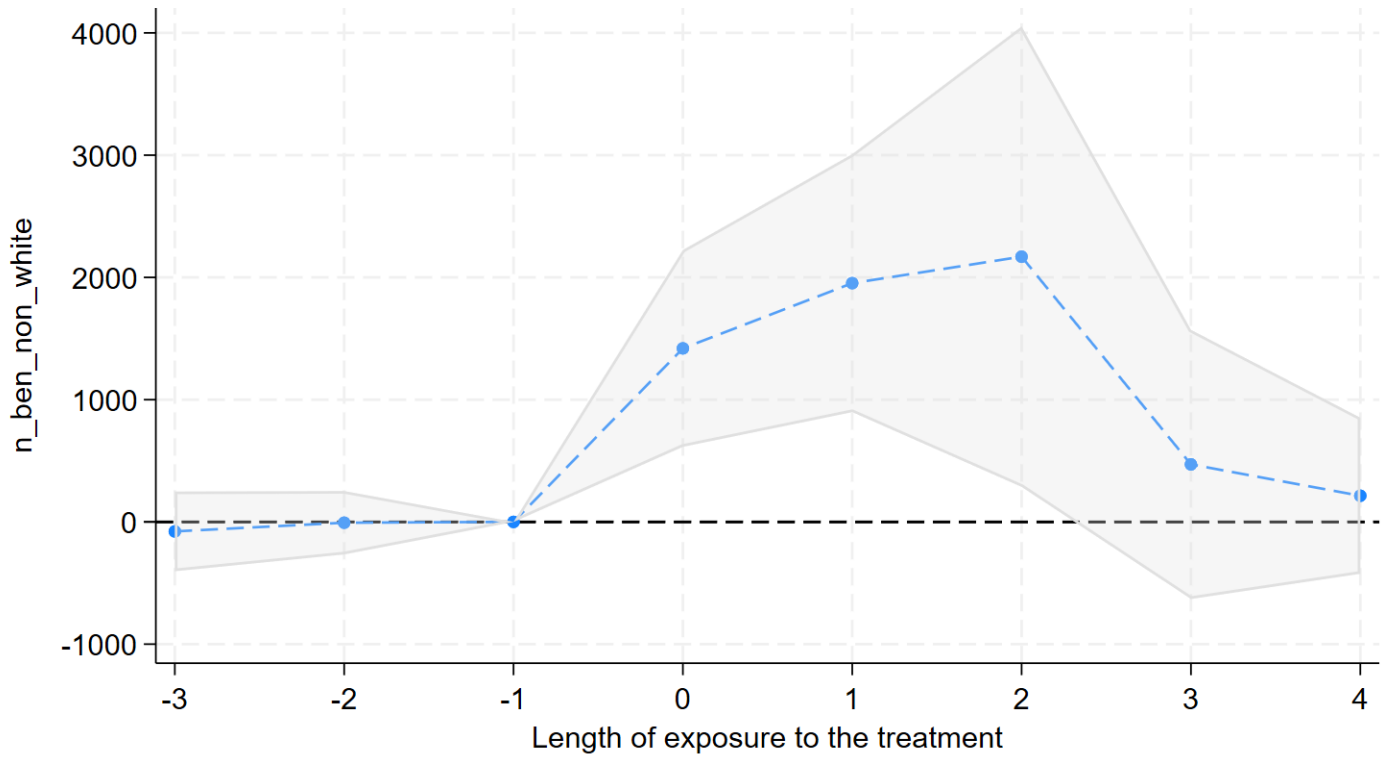

### FQHC and RHC visits

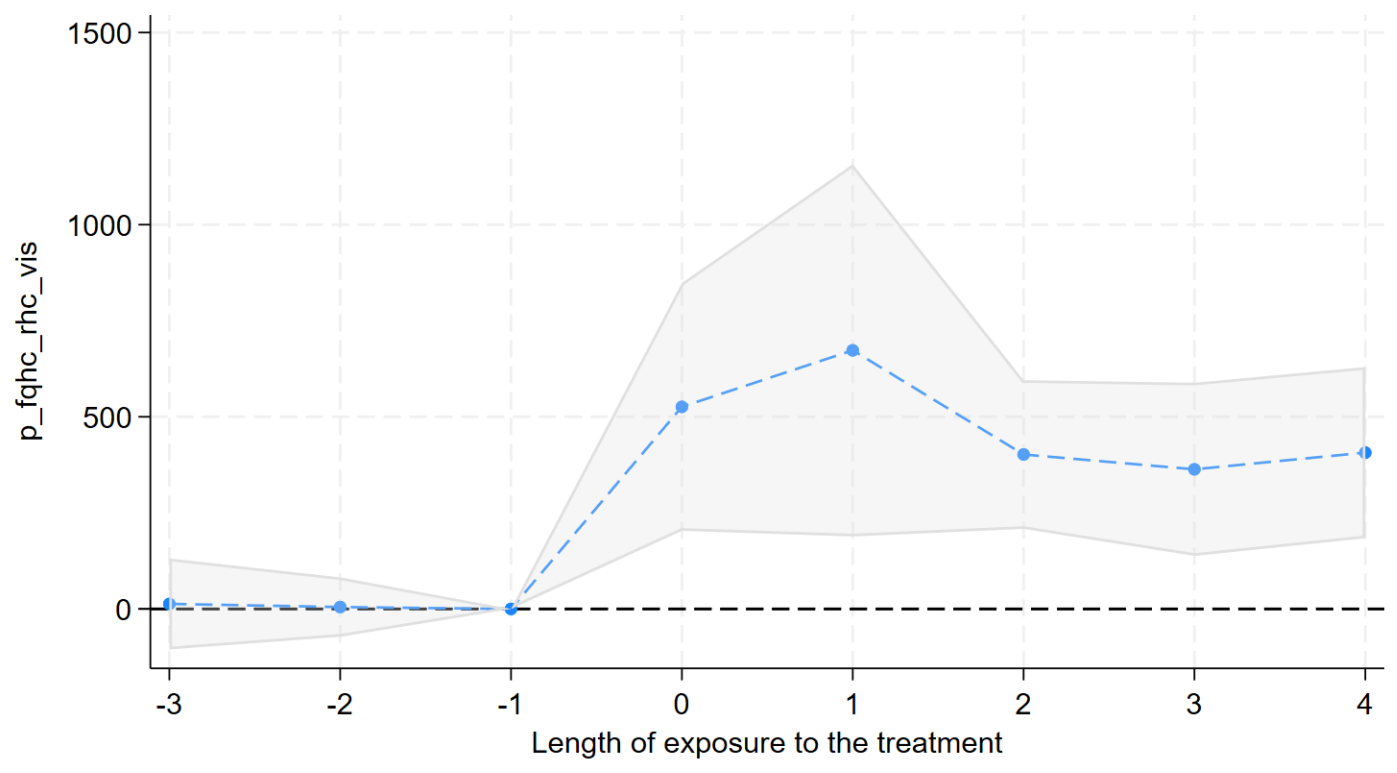

### Total primary care visits

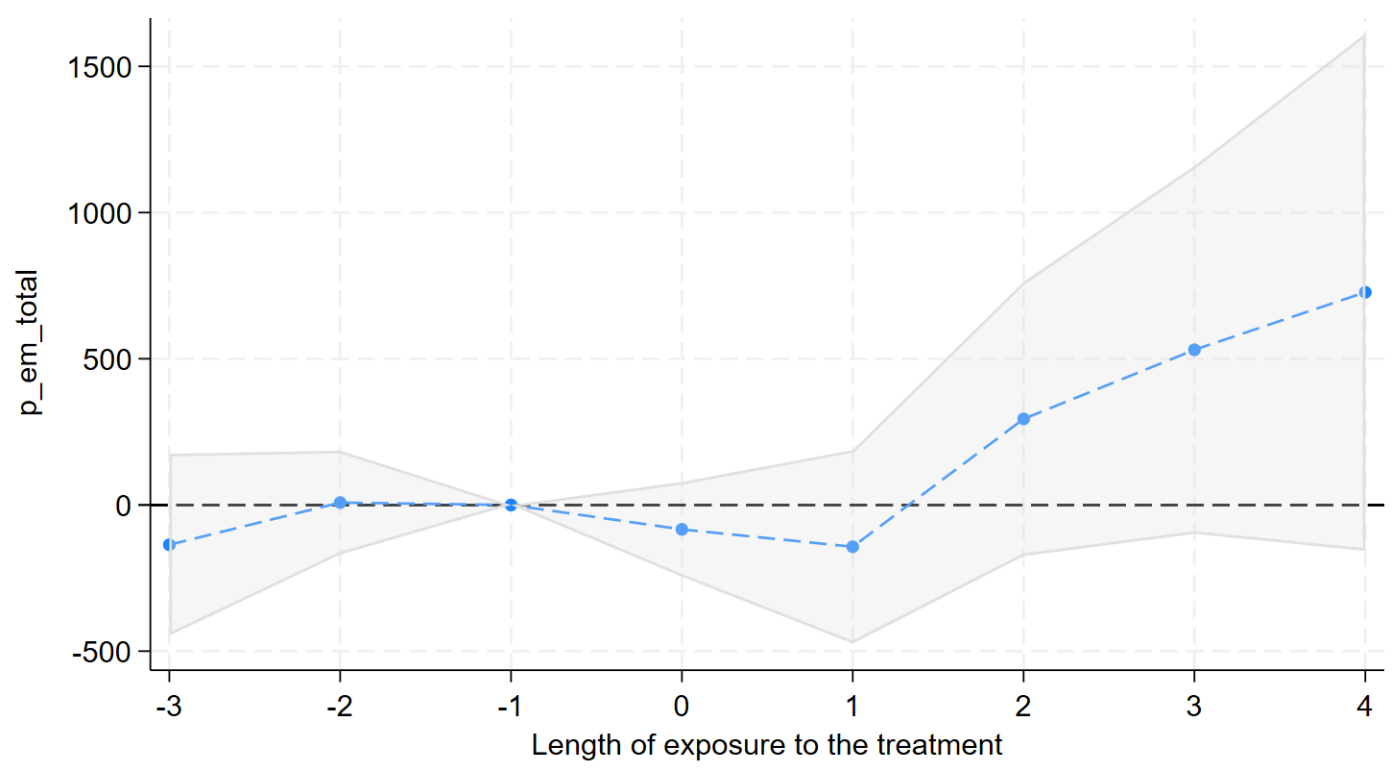

### Outpatient emergency department visits

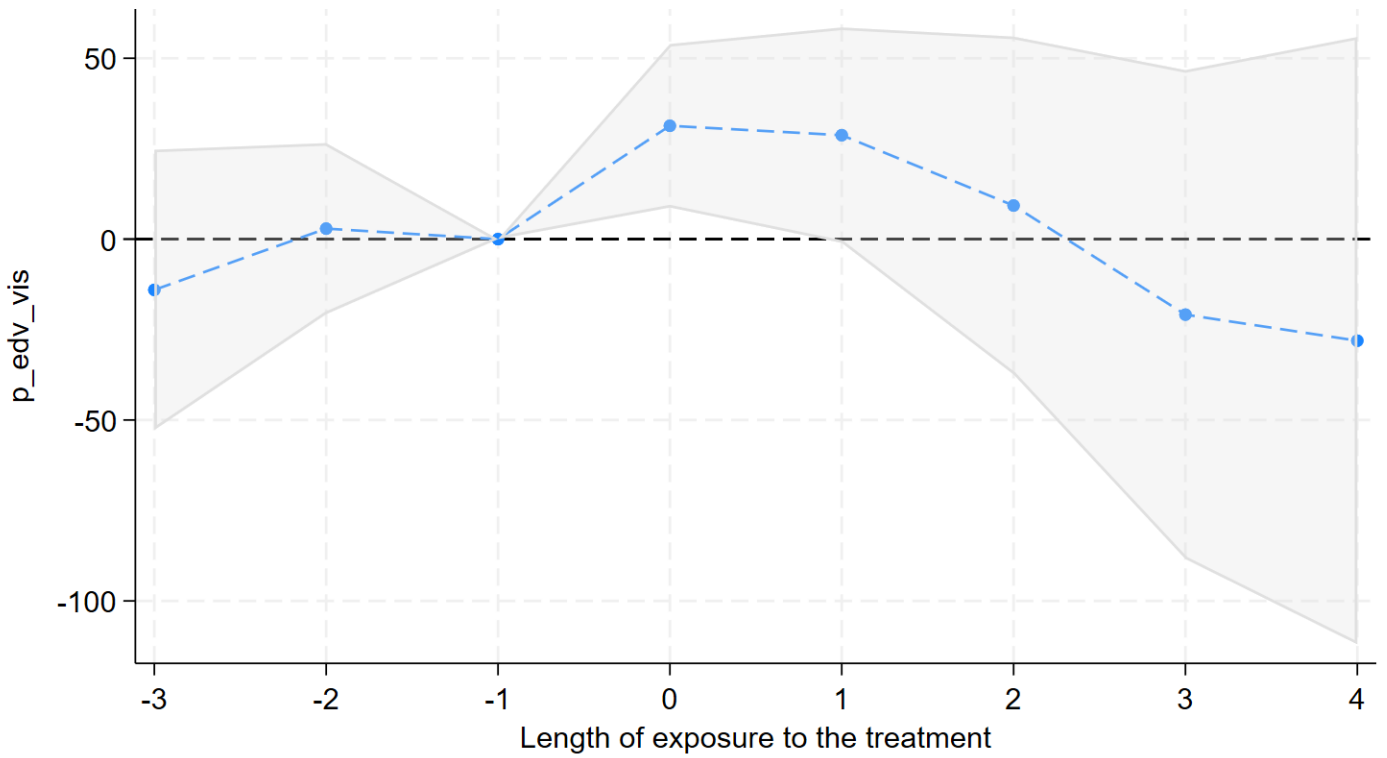

### Short-term acute care hospital discharges

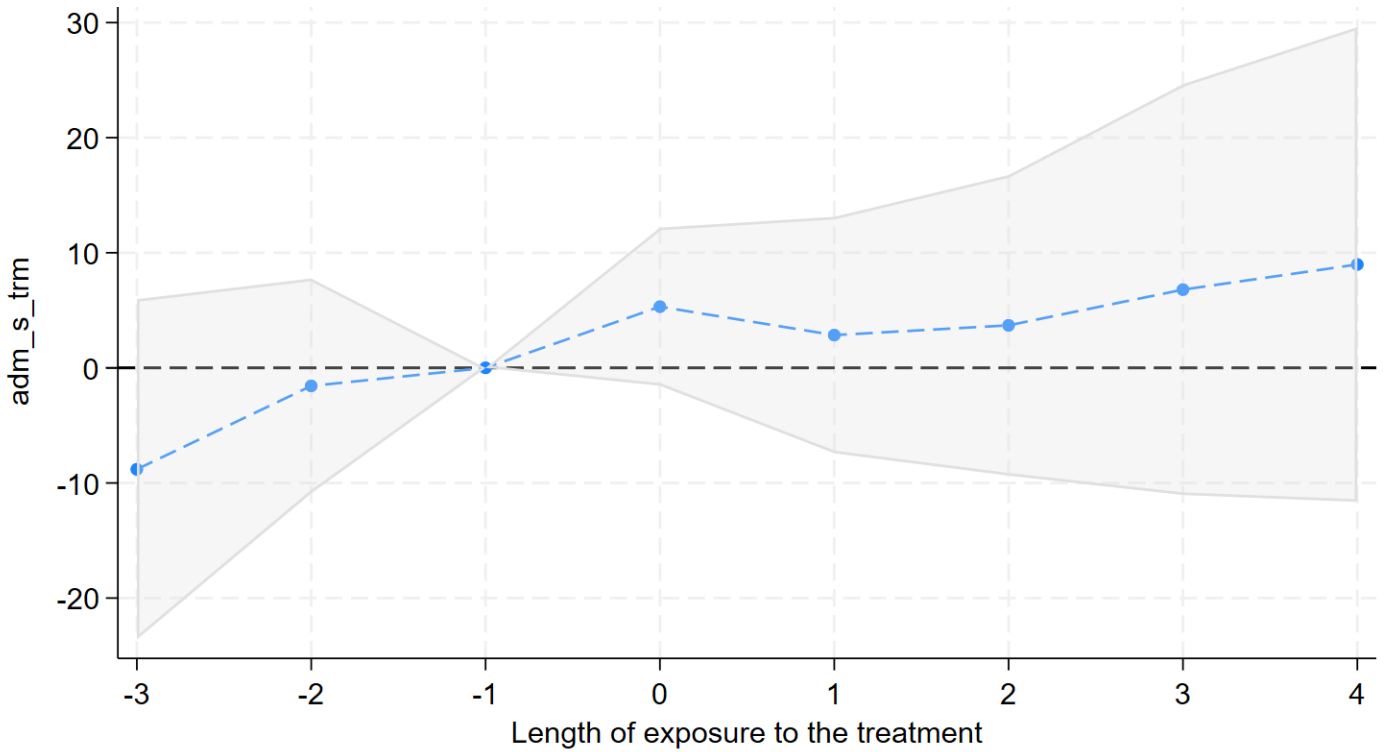

### Skilled nursing facility discharges

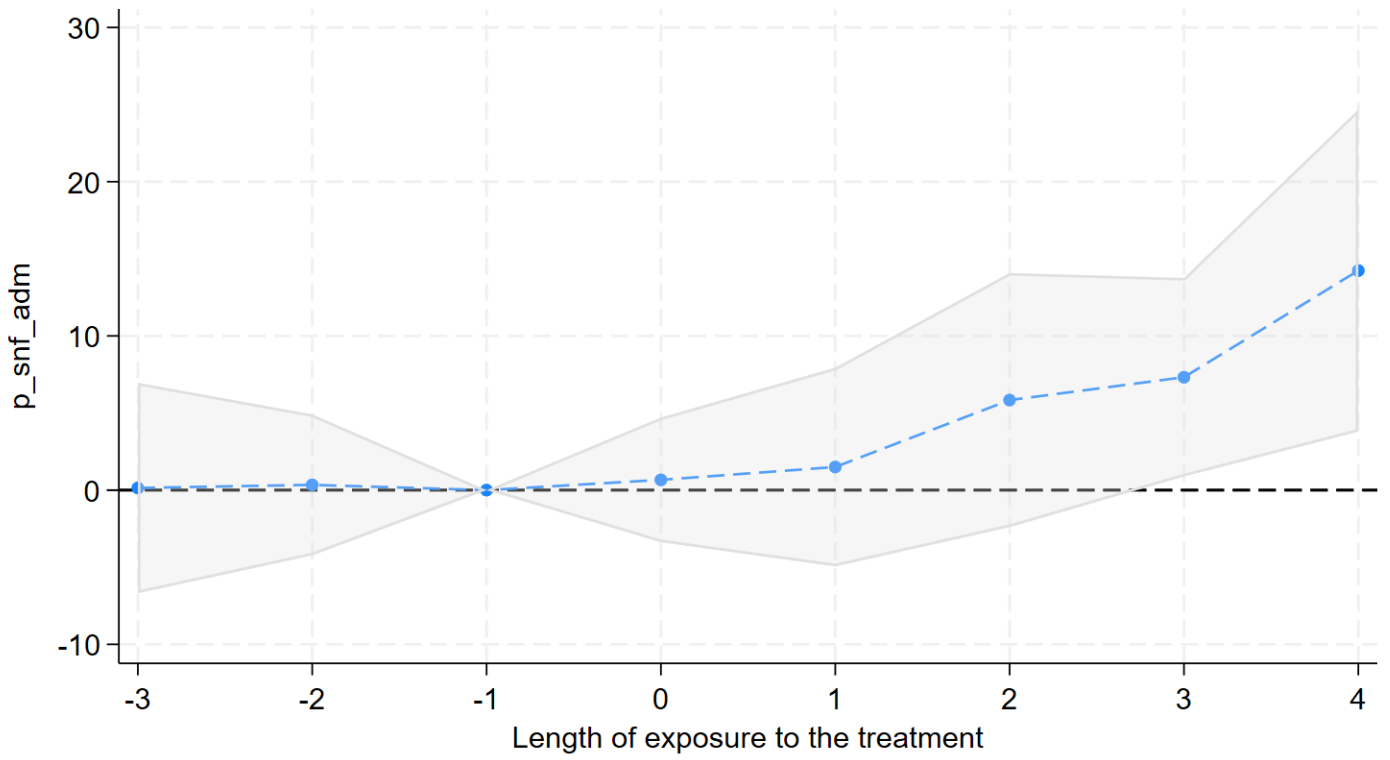

### Per capita expenditure

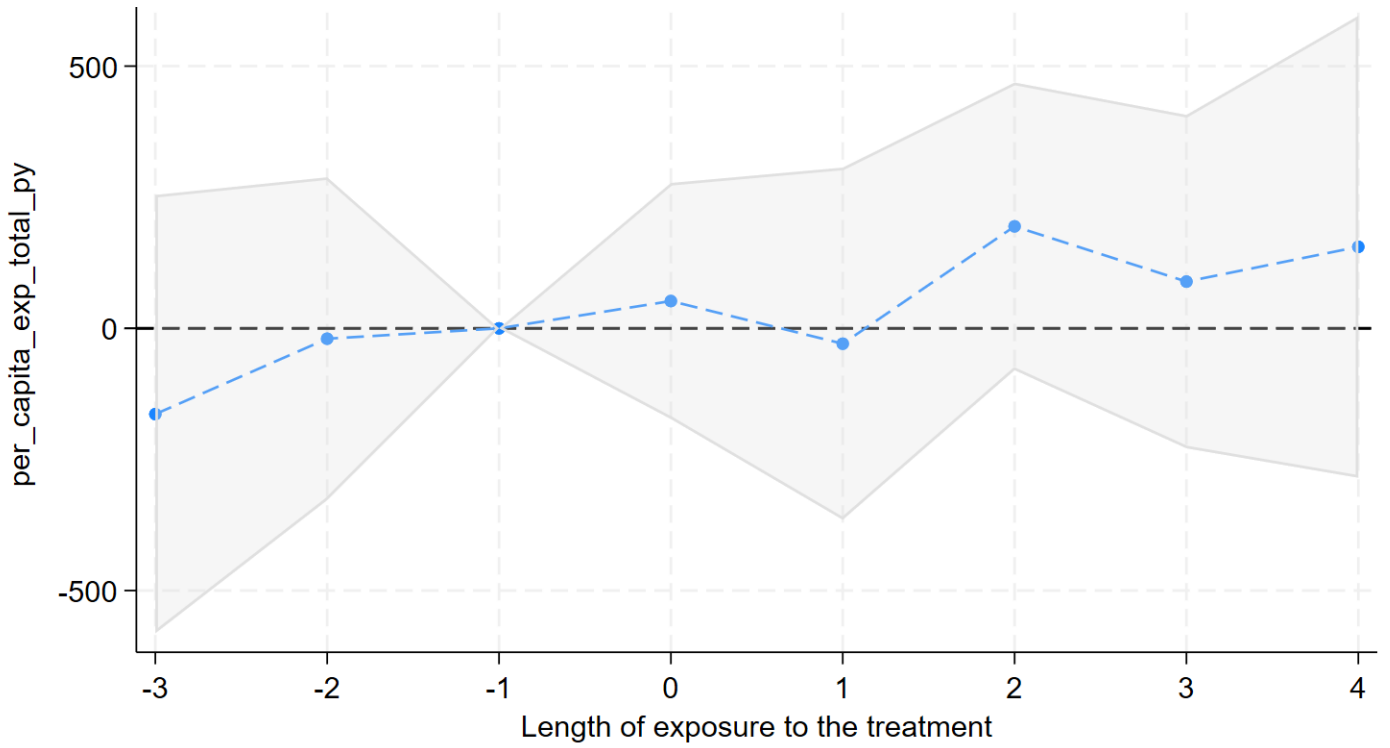



### Influenza immunization

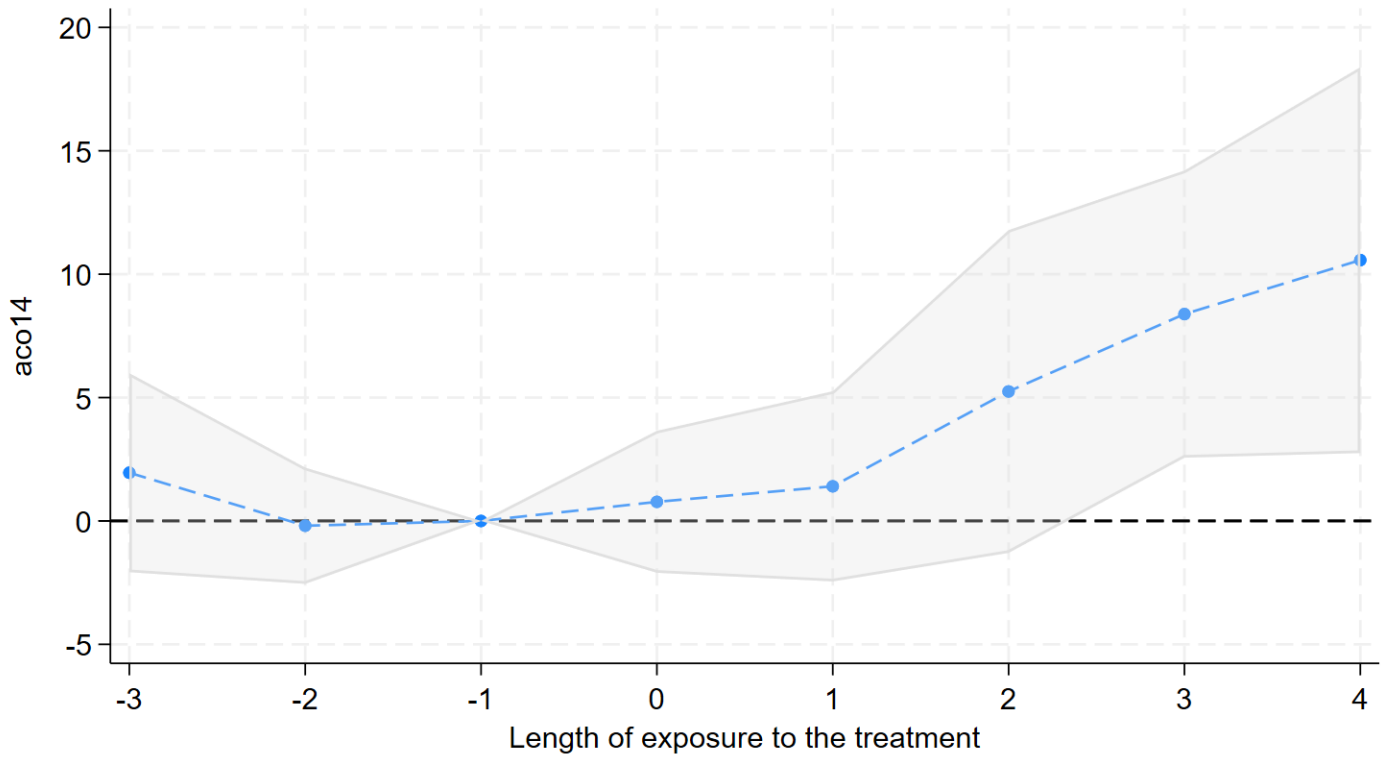

### Tobacco use screening and cessation intervention

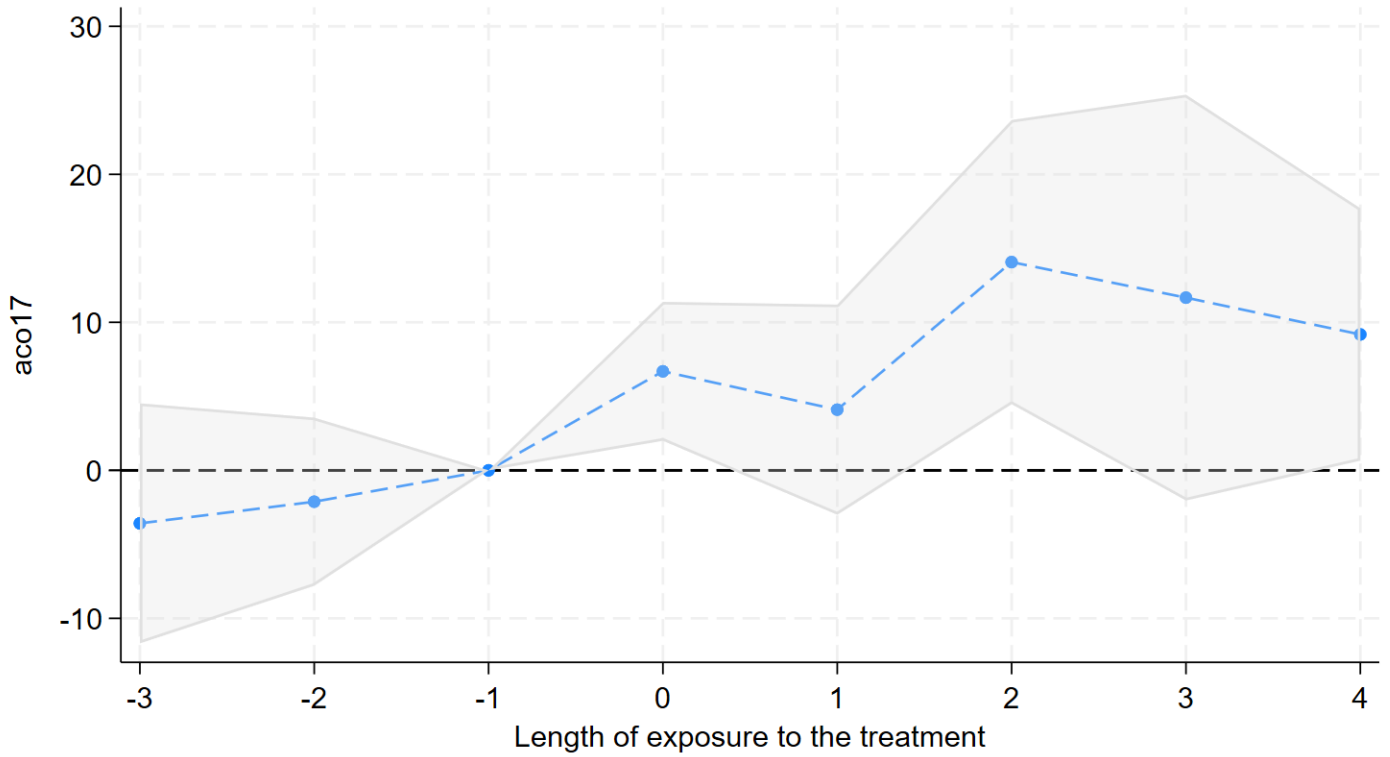

### Screening for depression and follow-up plan

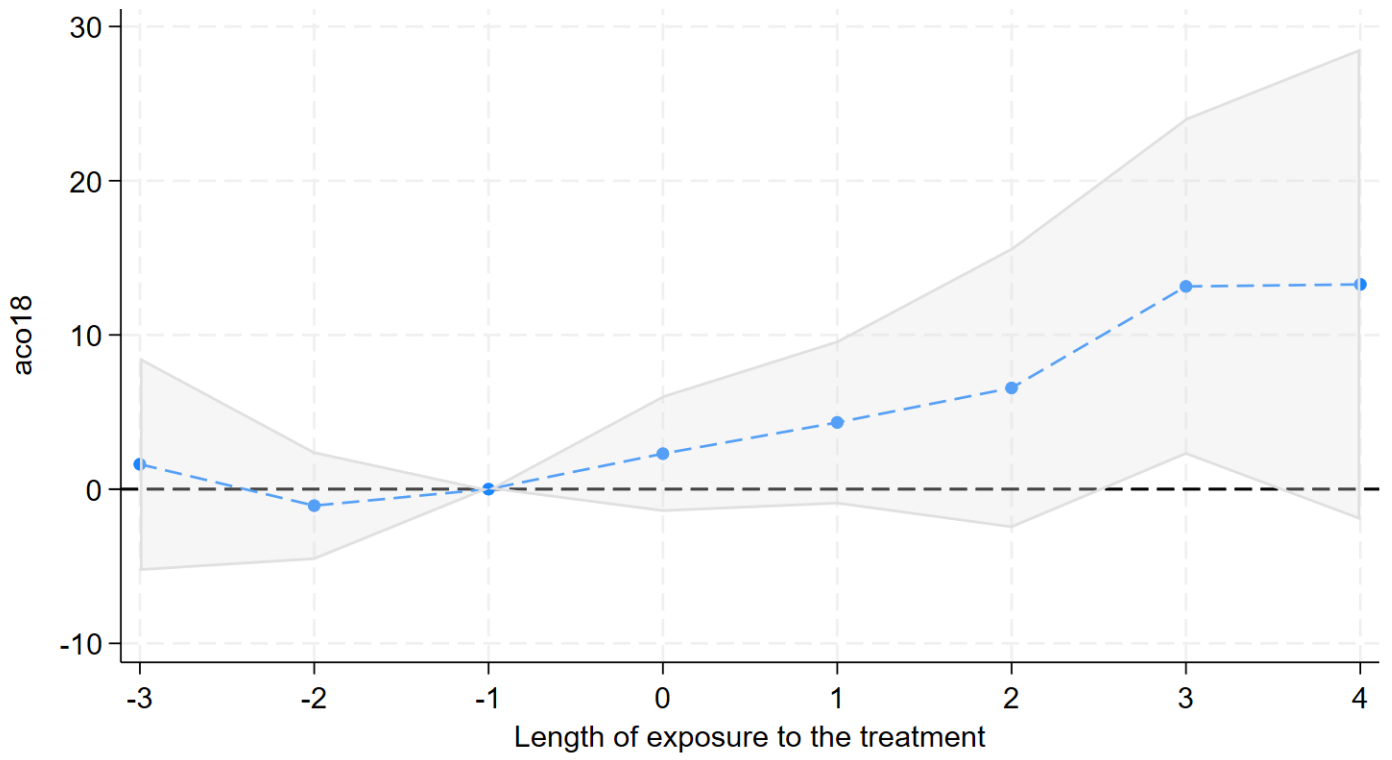

### Colorectal cancer screening

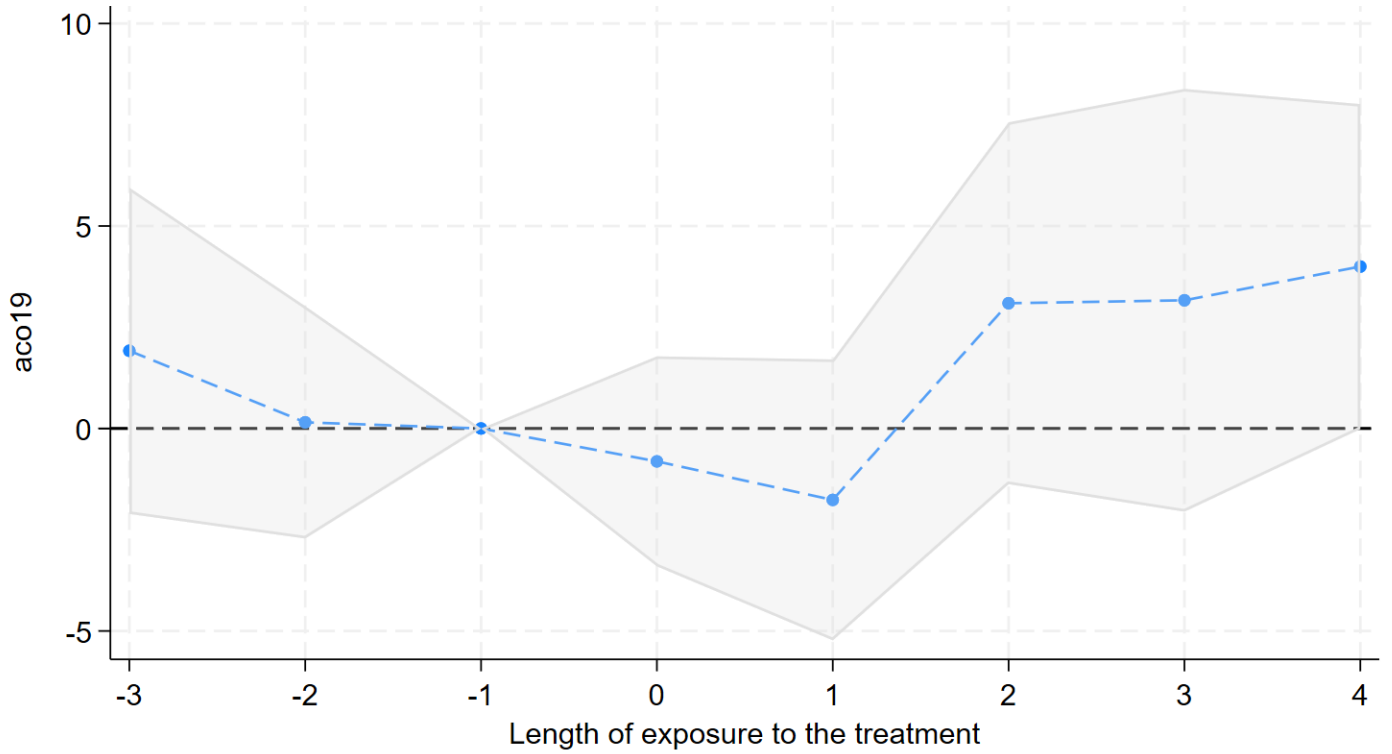

### Breast cancer screening

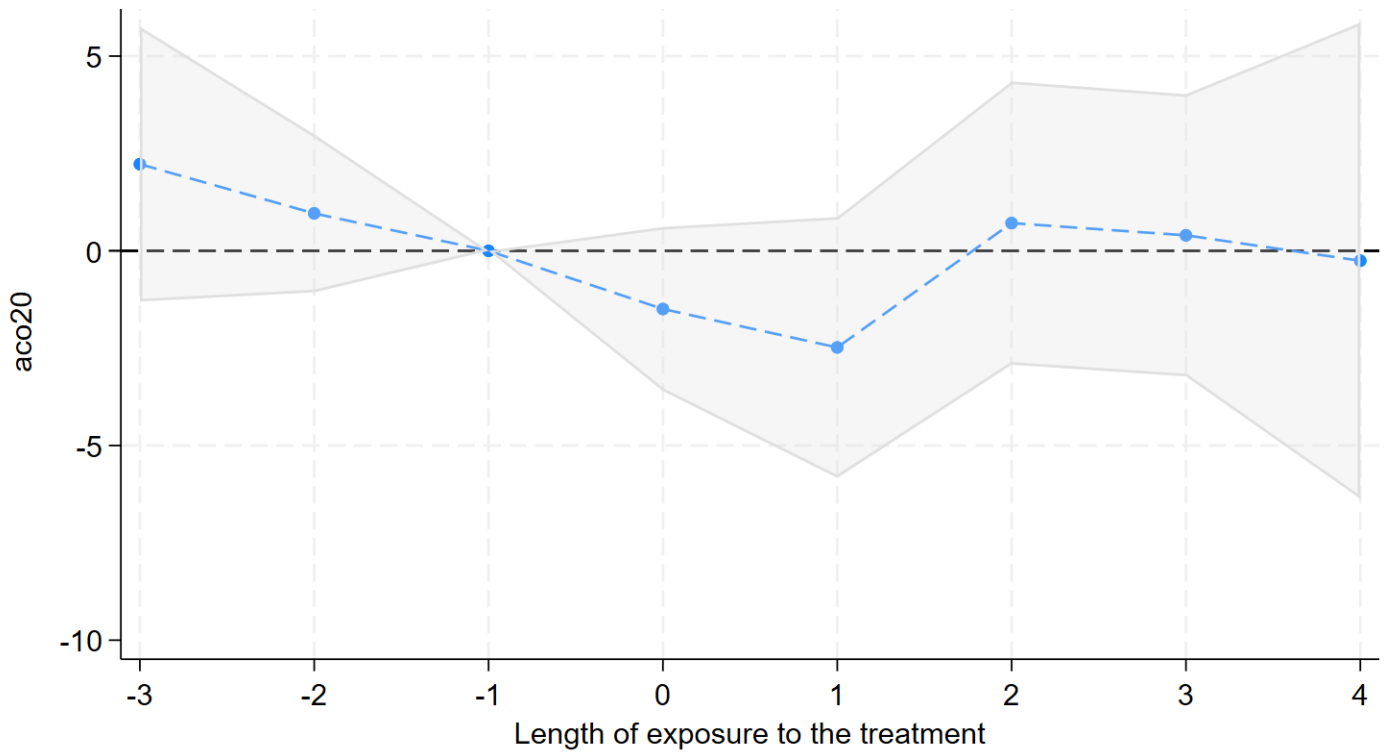

### Depression remission at 12 months

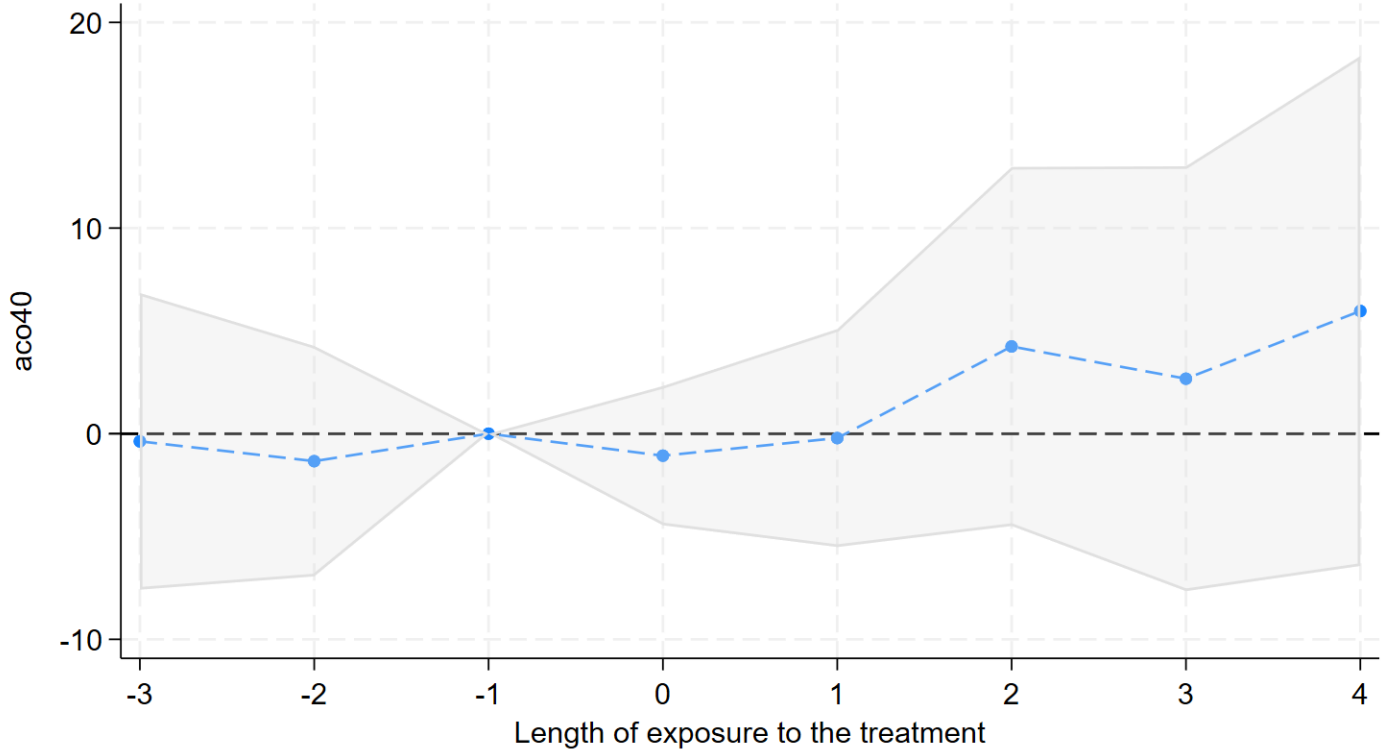

### Diabetes control: (HbA1c $\leq 9\%$ )

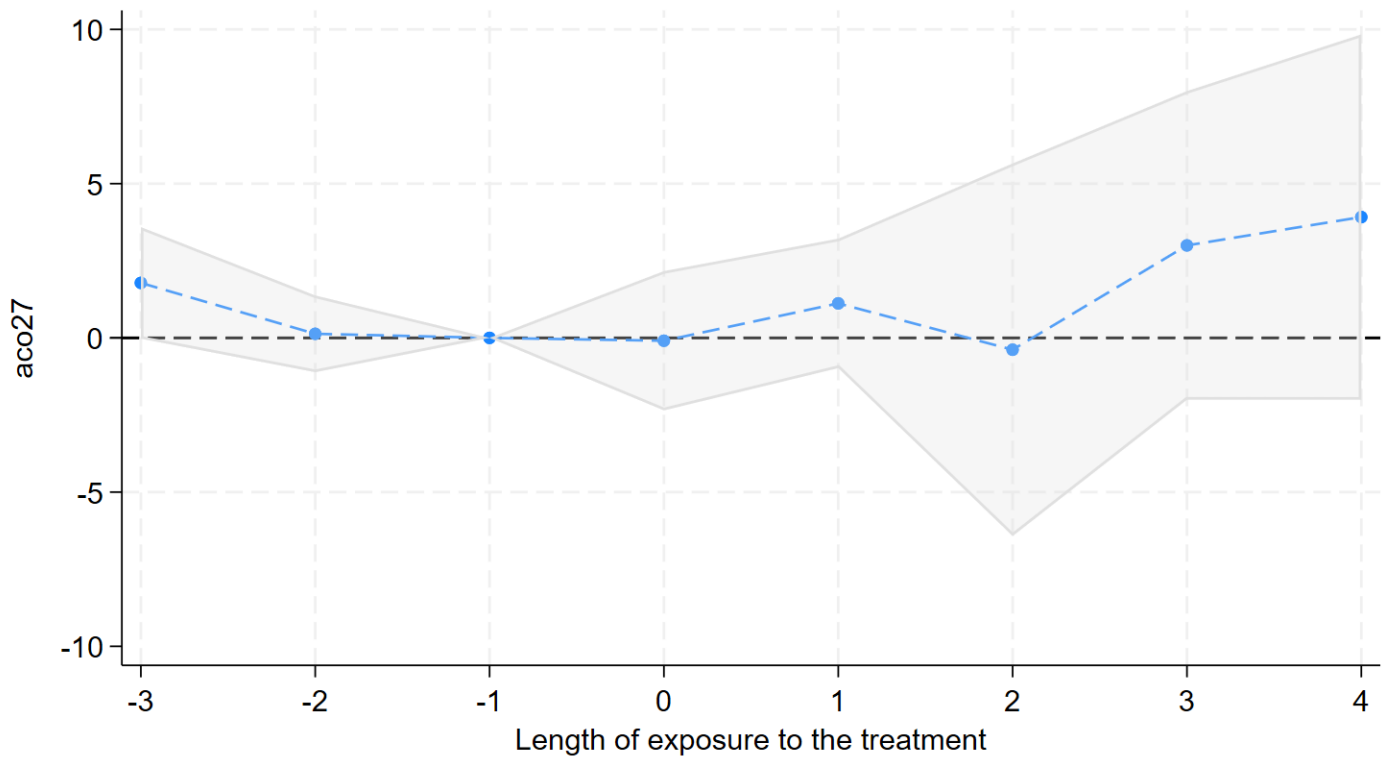

### Controlling high blood pressure

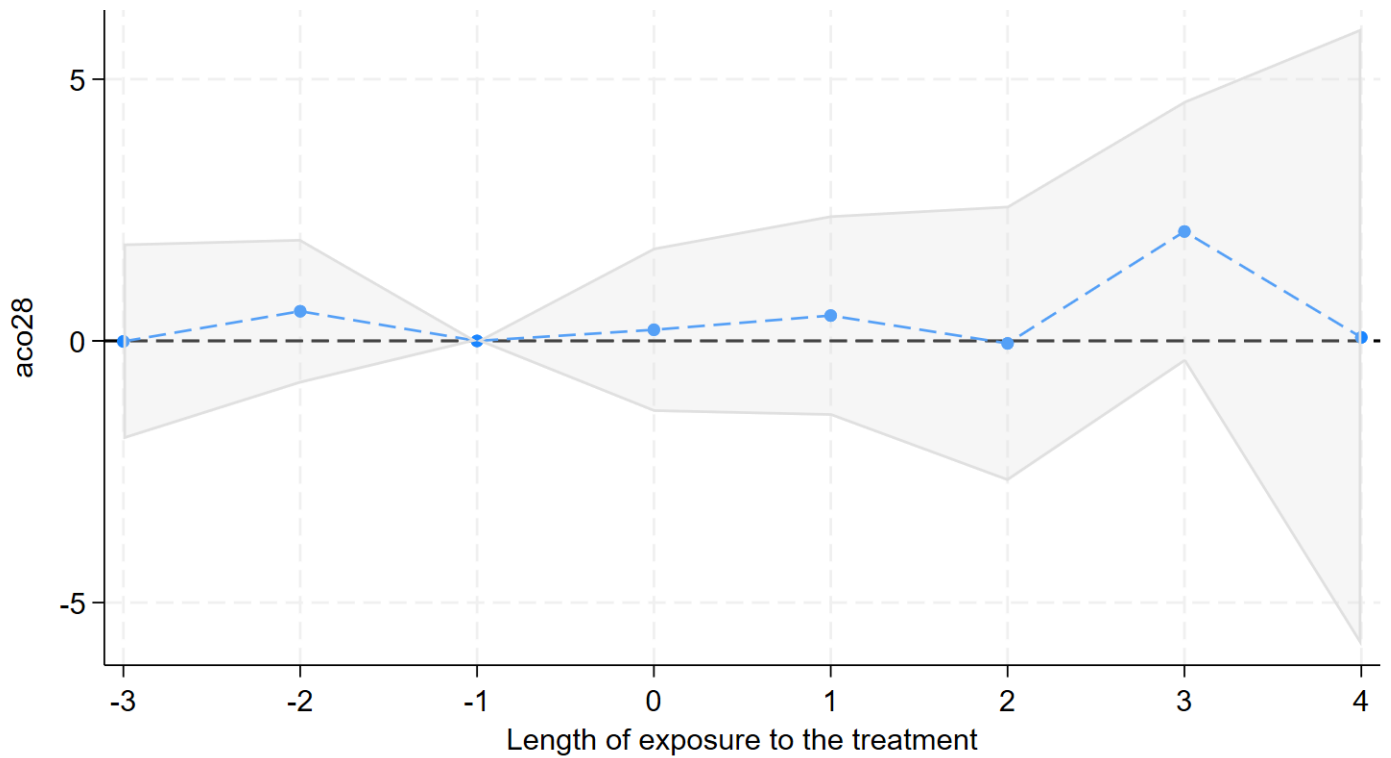

Supplement: jamanetwopen-e2445536-s001.pdf [file jamanetwopen-e2445536-s001.pdf]
