# Supplementary material for: Federally Qualified Health Centers and Performance of Medicare Accountable Care Organizations
Source: PubMed Central journal article supplement (PMC11574694; doi:10.1001/jamanetworkopen.2024.45536), 2024-11-18
Supplement: jamanetwopen-e2445536-s002.pdf [file jamanetwopen-e2445536-s002.pdf]

## Data Sharing Statement

Li. Federally Qualified Health Centers and Performance of Medicare Accountable Care Organizations. *JAMA Netw Open*. Published November 18, 2024.

doi:10.1001/jamanetworkopen.2024.45536

### Data

**Data available:** No

### Additional Information

**Explanation for why data not available:** The data is publicly available from the Centers for Medicare and Medicaid Services.
